# Supplementary material
Source: Springer Nature journal article supplement (http://www.springermedizin.de/resource/supplementary/13049_2008_23_MOESM3_ESM.pdf/9665794)

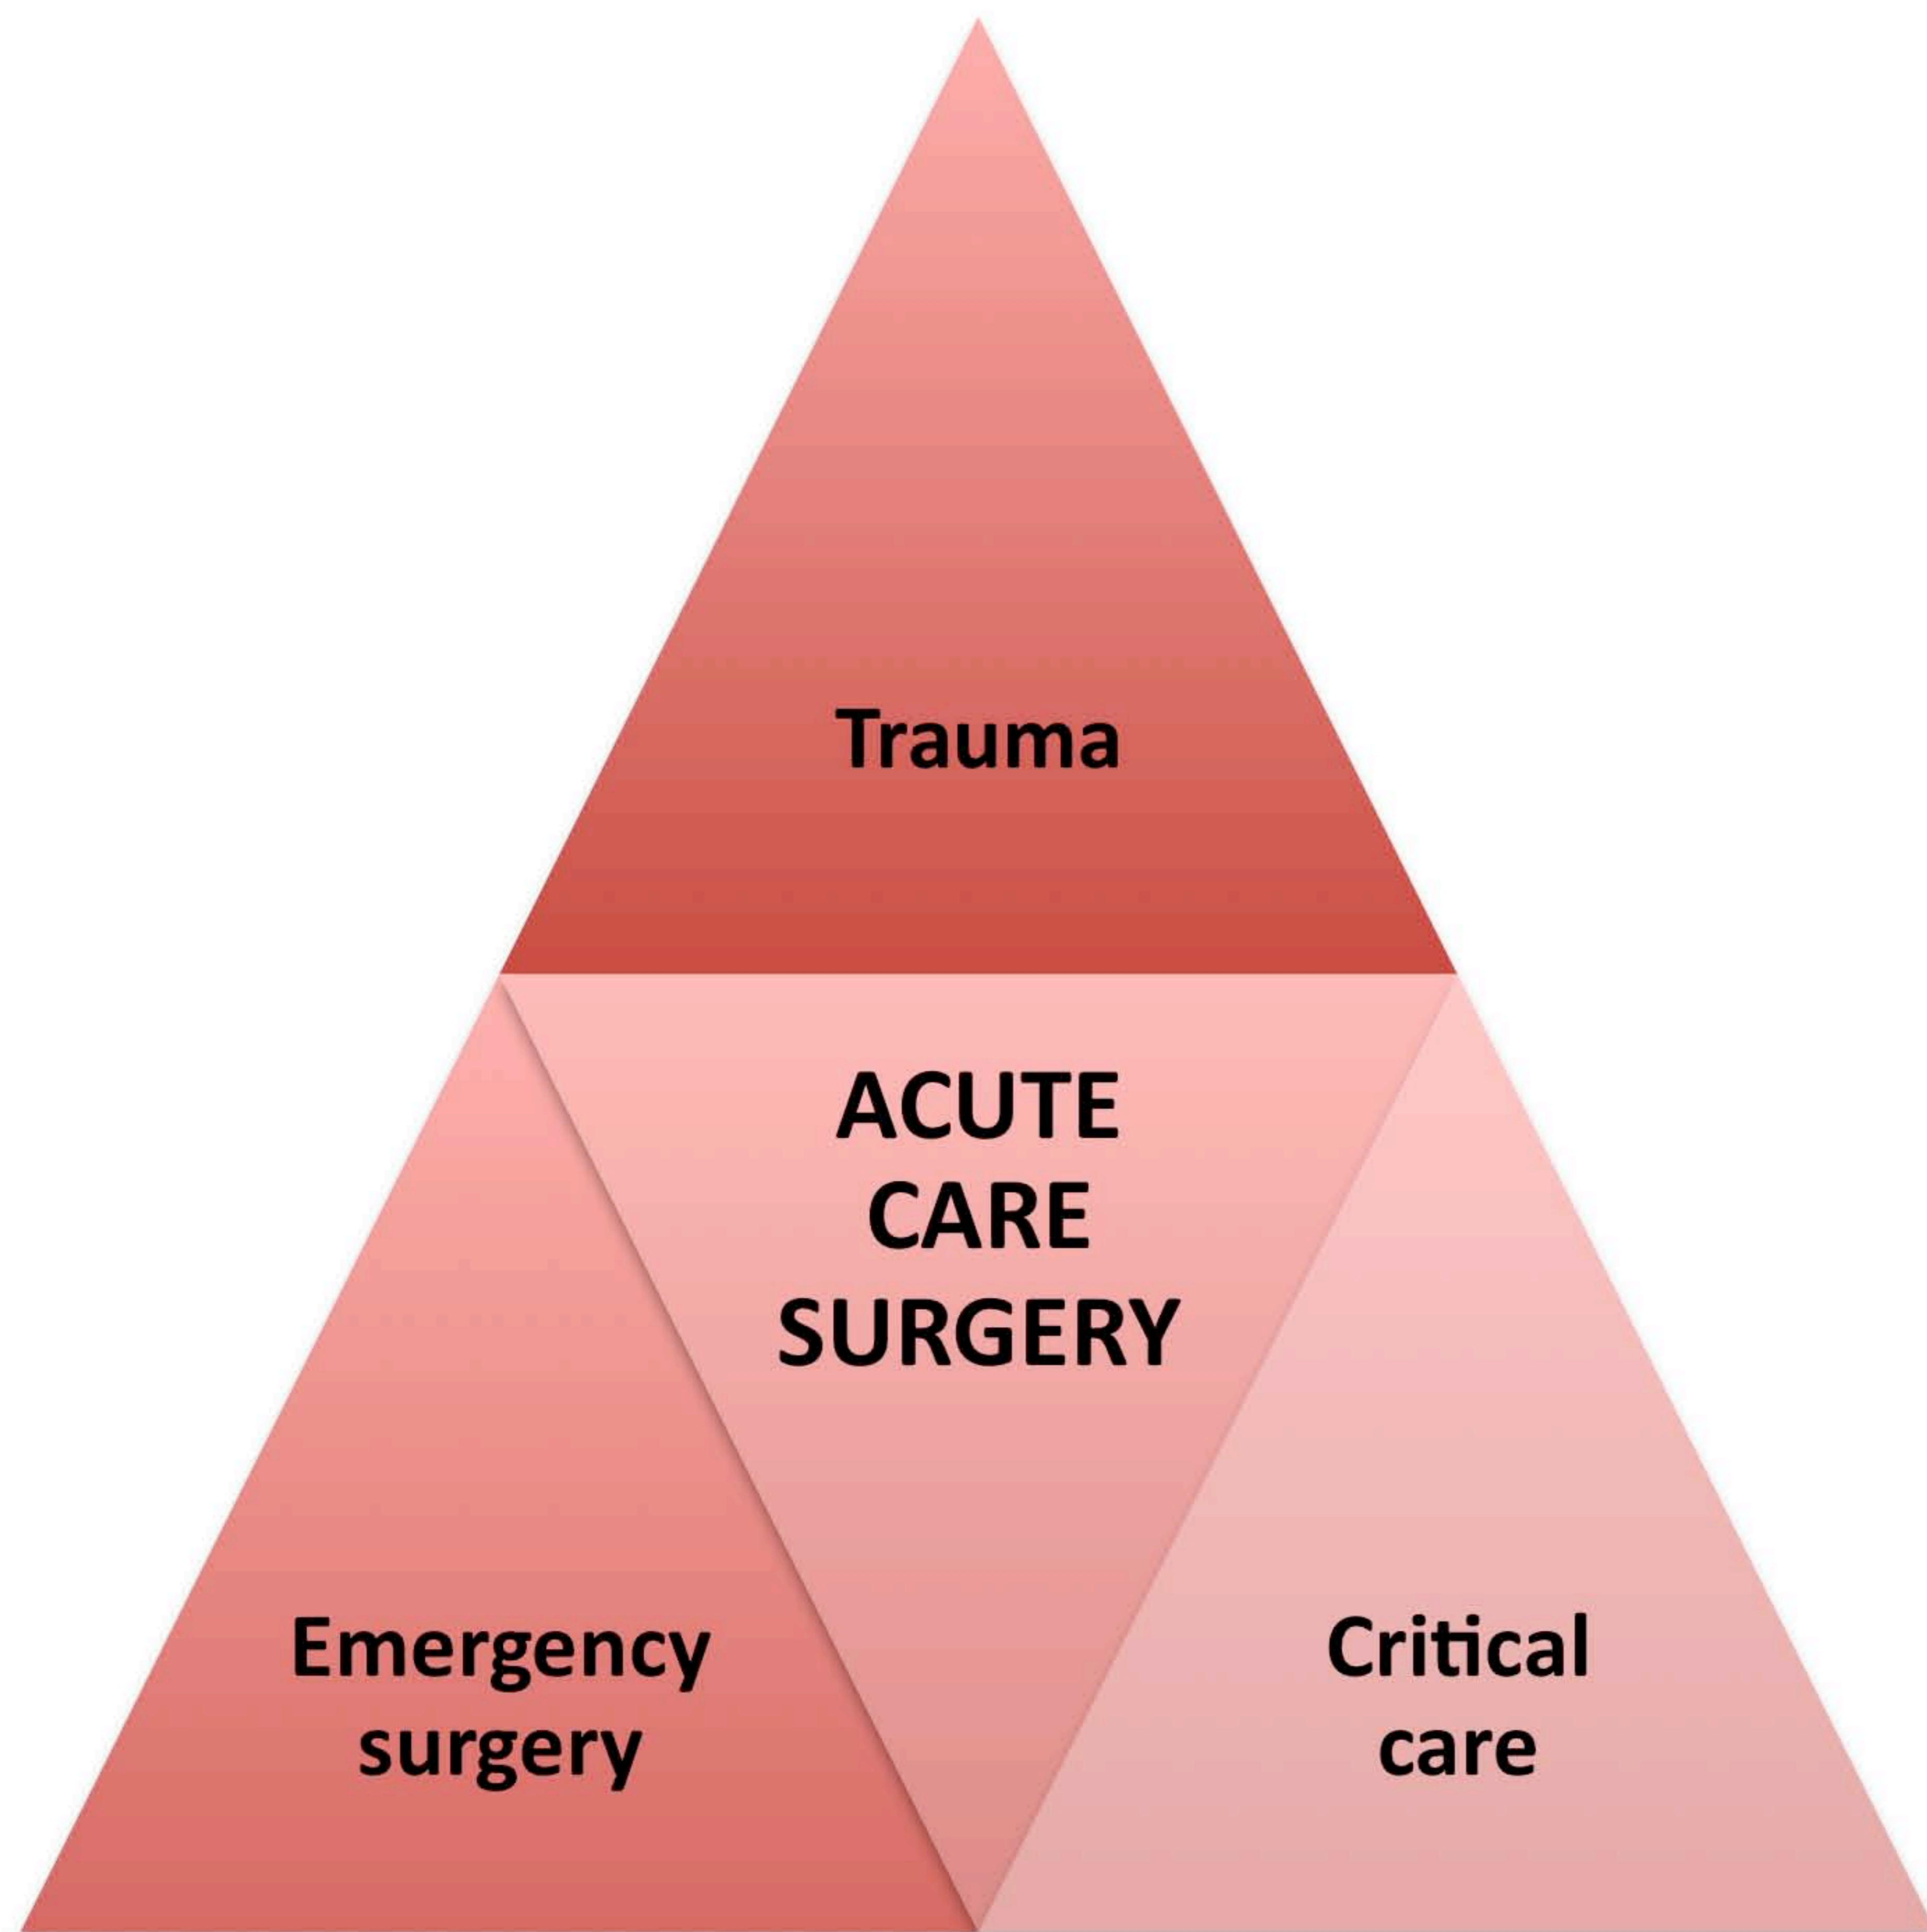

**Elective surgery**  
Hernia repair; laparoscopic cholecystectomy; selected cancer surgery etc...

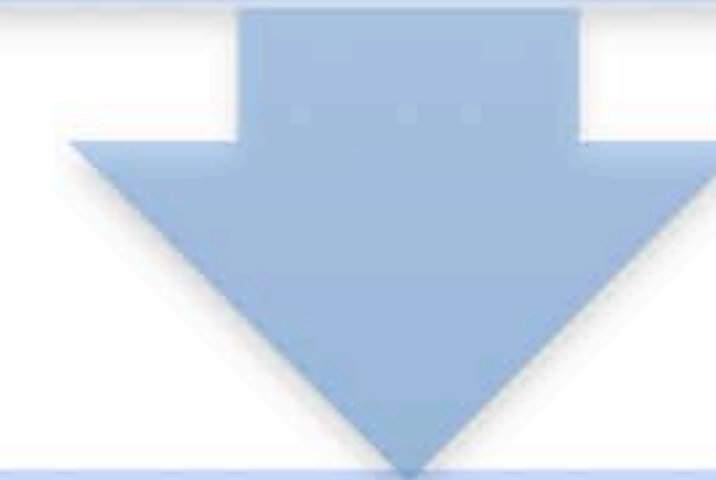

**Emergency surgery**  
Appendicitis, diverticulitis, perforated ulcers, abscesses, lacerations, ruptured AAA ...

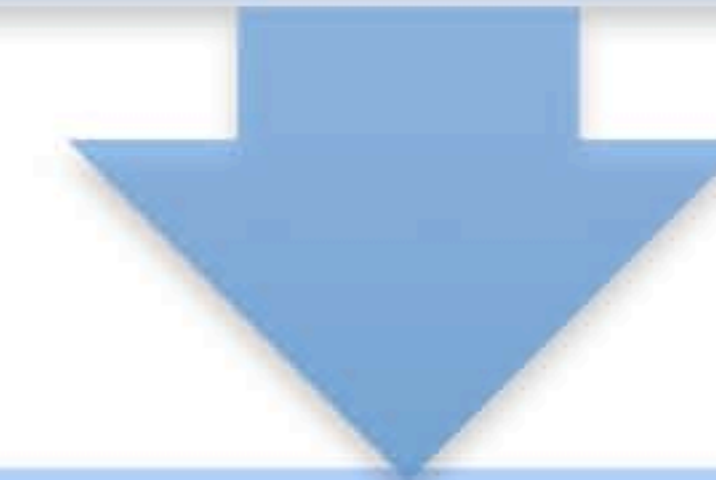

**Trauma surgery**  
Laparotomy; thoracotomy; splenectomy; pelvic packing; damage control techniques etc...

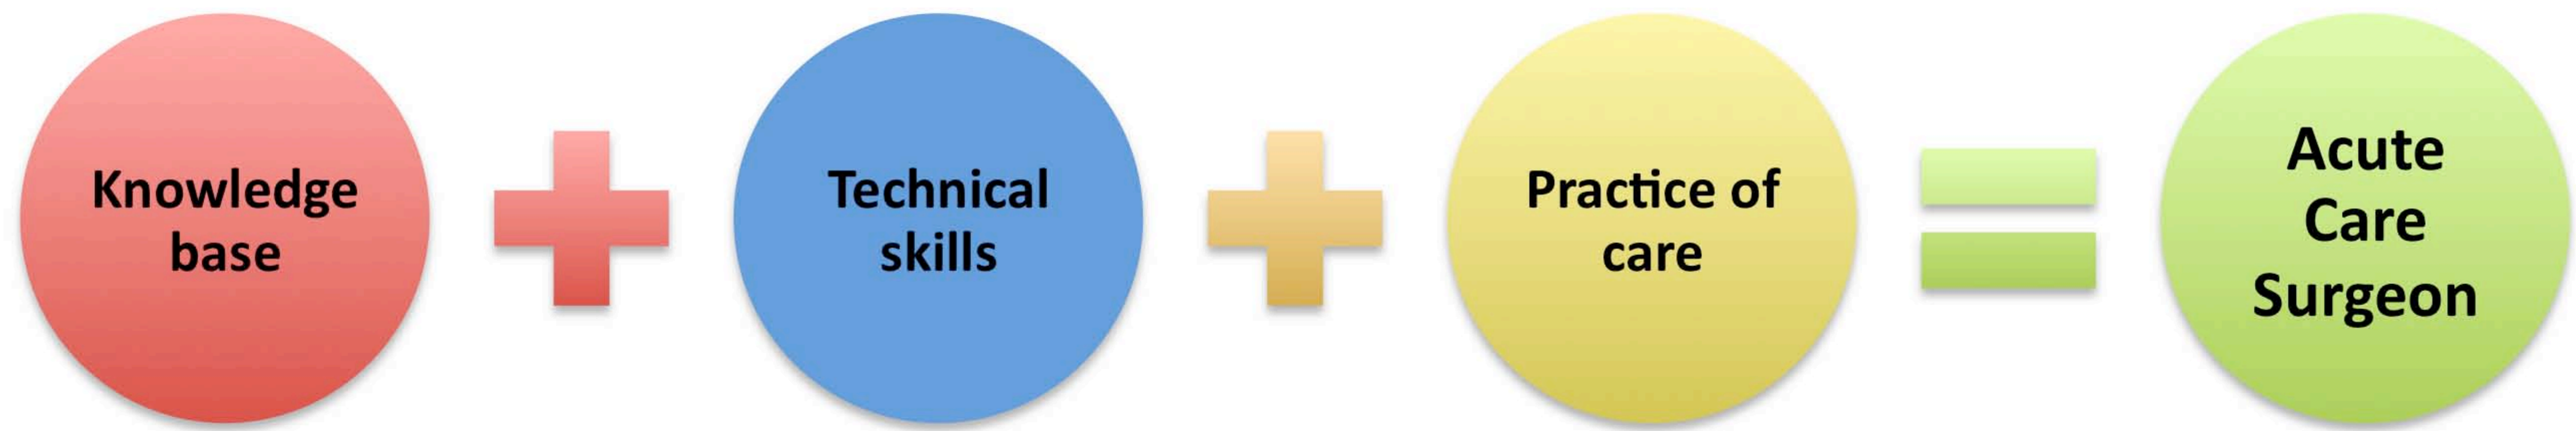

Supplement: MOESM3 [file 9665794]
